# Supplementary material
Source: PubMed Central journal article supplement (PMC1173161)
Supplement: 7600731s1.pdf [file 7600731s1.pdf]

Kalies et al., supplementary Figure 1

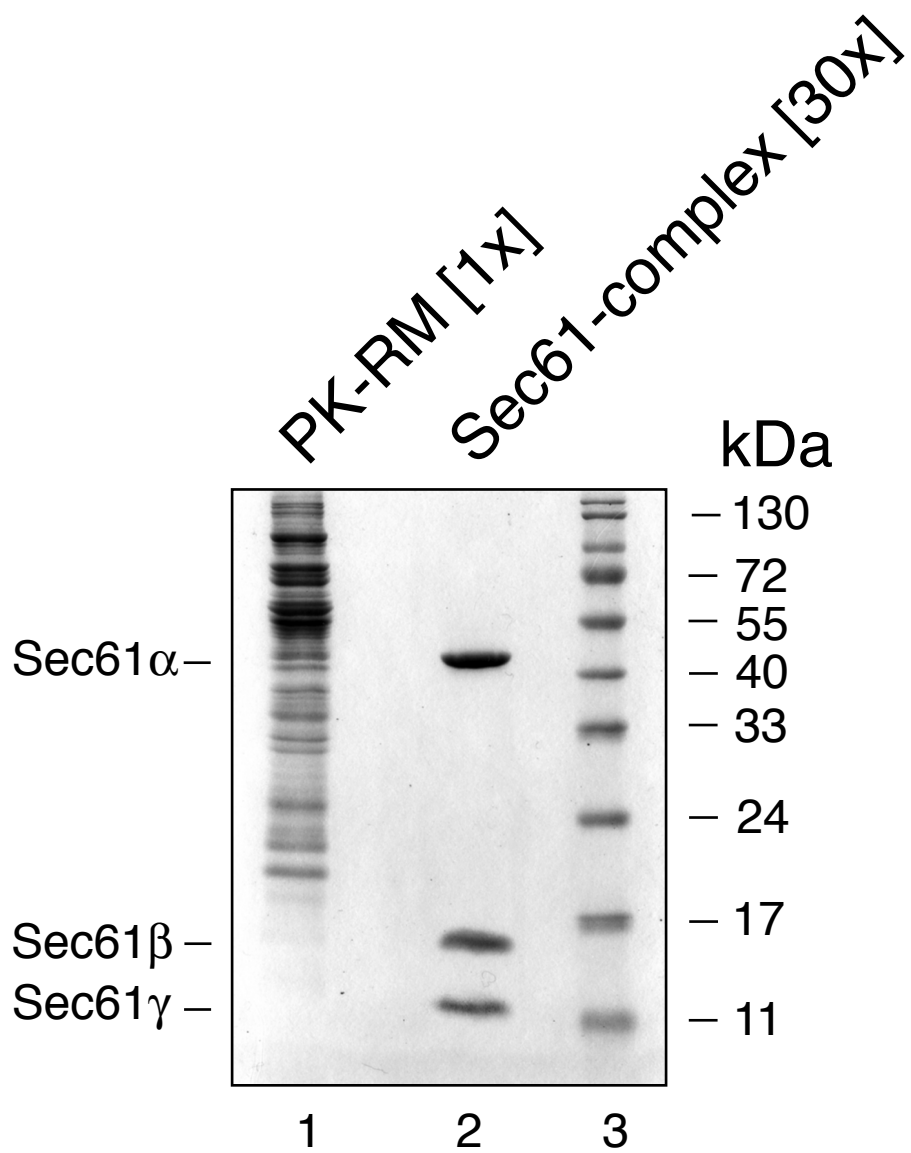

**Supp. Figure 1** Coomassie-staining of purified Sec61 complex

Puromycin/high salt-treated membranes (PK-RM) were prepared from dog pancreas as described and the Sec61 complex was purified by a combination of an immunoaffinity column and ion-exchange chromatography (Goerlich and Rapoport, 1993). Samples corresponding to 1 eq (PK-RM) or 30 eq (Sec61 complex) were separated by SDS-PAGE and stained with Coomassie Blue.

Goerlich, D., and Rapoport, T.A. (1993). Protein translocation into proteoliposomes reconstituted from purified components of the endoplasmic reticulum membrane. *Cell* **75**: 615–630.
